# Supplementary material for: Lessons to be Learnt from Real-World Studies on Immune-Related Adverse Events with Checkpoint Inhibitors: A Clinical Perspective from Pharmacovigilance
Source: Springer Nature journal article supplement (doi:10.1007/s11523-020-00738-6), 2020-07-28
Supplement: MOESM1 [file 18225902]

## **Lessons to be learnt from real world studies on immune-related adverse events with checkpoint inhibitors: a clinical perspective from pharmacovigilance**

*Emanuel Raschi, Milo Gatti, Francesco Gelsomino, Andrea Ardizzoni, Elisabetta Poluzzi, Fabrizio De Ponti*

Correspondence: [emanuel.raschi@unibo.it](mailto:emanuel.raschi@unibo.it)

## **Electronic Supplementary Material**

---

Management of irAEs. Adapted from Esfahani et al. [1]. General recommendations are based on main international guidelines [2-5].

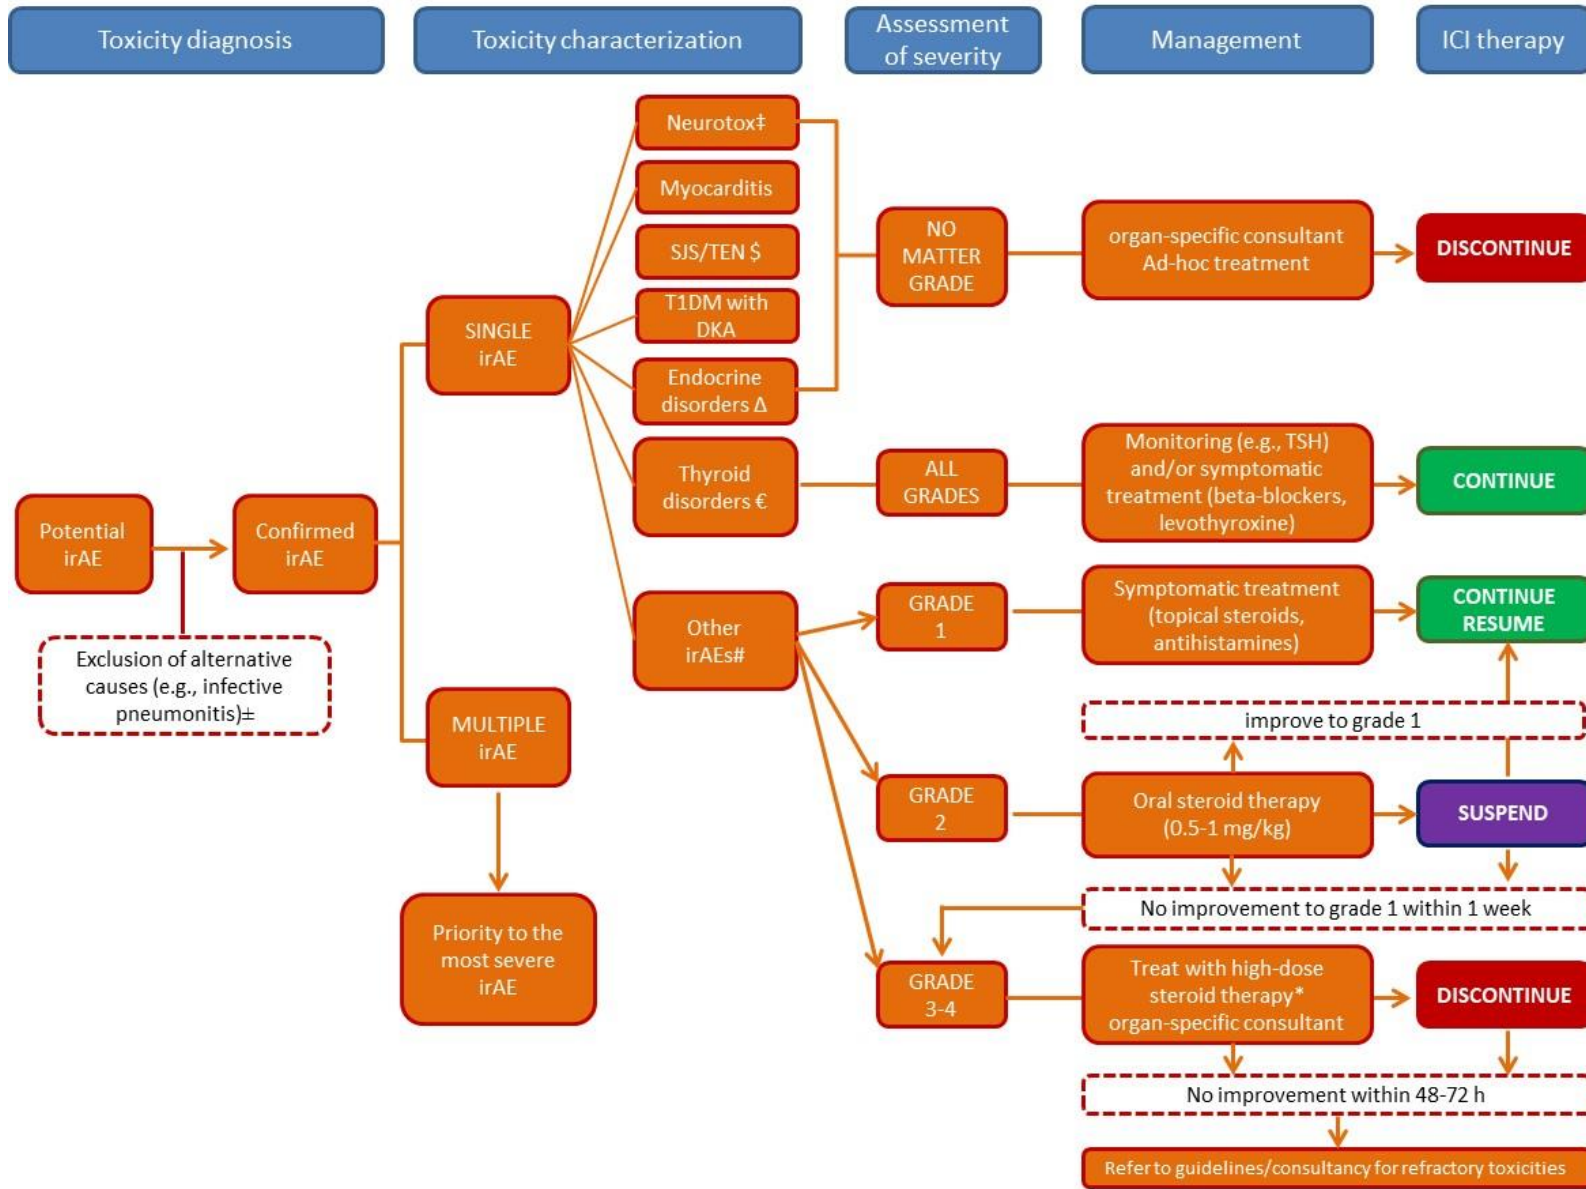

**Figure footnote.**

± clinical, imaging and laboratory baseline assessment is warranted prior to initiating treatment, and patient counseling on the warning signs and symptoms of irAEs.

\* prednisone or methylprednisolone 1-2 mg/kg/day.

§ SJS and TEN should be treated as G3-4 toxicities (permanent discontinuation and high-dose steroids).

# bullous dermatological toxicity requires urgent dermatology consultation. Bullous dermatitis should be managed according to the severity (G2 requires discontinuation and standard dose steroids).

Drug discontinuation can be considered also for grade 1 diarrhea/colitis and pneumonitis, renal failure).

‡ Guillain Barré Syndrome, Myasthenia Gravis, Transverse myelitis require permanent discontinuation.

Δ Primary adrenal insufficiency, central hypothyroidism, hypophysitis

€ Clinical primary hypothyroidism, asymptomatic/subclinical hypothyroidism, Thyrotoxicosis (interruption only if symptomatic).

DKA: diabetic ketoacidosis; SJS: Stevens Johnson Syndrome; TEN: Toxic Epidermal Necrolysis, T1DM: type 1 diabetes mellitus.

## References

1. Esfahani K, Meti N, Miller WH, Jr., Hudson M. Adverse events associated with immune checkpoint inhibitor treatment for cancer. *CMAJ* 2019; 191: E40-E46.
2. Thompson JA, Schneider BJ, Brahmer J, Andrews S, Armand P, Bhatia S, et al. Management of Immunotherapy-Related Toxicities, Version 1.2019. *J Natl Compr Canc Netw* 2019; 17: 255-89.
3. Brahmer JR, Lacchetti C, Schneider BJ, Atkins MB, Brassil KJ, Caterino JM, et al. Management of Immune-Related Adverse Events in Patients Treated With Immune Checkpoint Inhibitor Therapy: American Society of Clinical Oncology Clinical Practice Guideline. *J Clin Oncol* 2018; 36: 1714-68.
4. Puzanov I, Diab A, Abdallah K, Bingham CO, III, Brogdon C, Dadu R, et al. Managing toxicities associated with immune checkpoint inhibitors: consensus recommendations from the Society for Immunotherapy of Cancer (SITC) Toxicity Management Working Group. *J Immunother Cancer* 2017; 5: 95.
5. Haanen JBAG, Carbonnel F, Robert C, Kerr KM, Peters S, Larkin J, et al. Management of toxicities from immunotherapy: ESMO Clinical Practice Guidelines for diagnosis, treatment and follow-up. *Ann Oncol* 2017; 28: iv119-iv142.
